# Supplementary material for: Auricular Acupressure for Dry Eye Disease: A Systematic Review and Meta-Analysis of Randomized Controlled Trials
Source: MDPI journal article supplement (doi:10.3390/medicina59010177), 2023-01-16
Supplement: s1 [file s1]

## Supplementary File S2

### Searching Strategy

1. Randomized Controlled Trial.pt.
2. Controlled Clinical Trial.pt.
3. (randomized or randomised).ab,ti.
4. placebo.ab,ti.
5. drug therapy.fs.
6. randomly.ab,ti.
7. trial.ab,ti.
8. groups.ab,ti.
9. 1 or 2 or 3 or 4 or 5 or 6 or 7 or 8
10. exp animals/ not humans.sh.
11. 9 not 10
12. exp dry eye syndromes/
13. (dry adj2 eye\*).tw.
14. (ocular adj2 dry\*).tw.
15. exp tears/
16. tear\*.tw.
17. exp xerophthalmia/
18. xerophthalmi\*.tw.
19. exp vitamin A deficiency/
20. (vitamin A adj3 deficien\*).tw.
21. (avitaminosis a or retinol deficien\* or hypovitaminosis A).tw.
22. exp keratoconjunctivitis sicca/
23. (Keratoconjunctiv\* or kerato conjunctivitis).tw.
24. exp Keratoconjunctivitis/
25. limit 24 to yr="1966 - 1985"
26. exp Sjogren's syndrome/
27. ((Sjogren\* or Sjoegren\*) adj2 (syndrom\* or disease\*)).tw.
28. sicca syndrom\*.tw.
29. exp Stevens Johnson syndrome/
30. (Steven\* and Johnson and (syndrom\* or disease\*)).tw.
31. exp Pemphigoid, Benign Mucous Membrane/
32. Benign Muco\* Pemphigoid\*.tw.
33. (Cicatricial adj2 Pemphigoid\*).tw.
34. blepharoconjunctiviti\$.tw.
35. exp meibomian glands/
36. (meibomian or tarsal).tw.
37. exp lacrimal apparatus diseases/
38. (lacrima\* or epiphora).tw.
39. or/12-23,25-38
40. exp Acupuncture/
41. exp Acupuncture Therapy/
42. exp Medicine, Chinese Traditional/

43. exp Acupressure/
44. (acupunctur\* or acupressur\*).tw.
45. (meridian\* or moxi\*).tw.
46. (electrostimulat\* or electroacupunctur\*).tw.
47. (electro\* adj1 (stimulat\* or acupunctur\*)).tw.
48. acupoint\*.tw.
49. exp Bloodletting/
50. (erjian or taiyang or EX-HN6 or EX-HN5).tw.
51. body needl\*.tw.
52. (bloodletting or blood-letting or pricking blood).tw.
53. (Ear-apex or temporal region).tw.
54. qi.tw.
55. ((chinese adj3 medicin\*) or TCM).tw.
56. or/40-55
57. 39 and 56
58. 11 and 57
